# Supplementary material
Source: PubMed Central journal article supplement (PMC5402354)
Supplement: NIHMS832202-supplement-1.pdf [file NIHMS832202-supplement-1.pdf]

Table S1: intra-pair correlations of brain regional GMV associated with BMI within identical twin pairs

| Brain Region                             | cluster extent | pFWE*            | r           | MNI (mm)   |            |            |
|------------------------------------------|----------------|------------------|-------------|------------|------------|------------|
|                                          |                |                  |             | x          | y          | z          |
| <b>BMI pos.</b>                          |                |                  |             |            |            |            |
| <b>L Rectal Gyrus</b>                    | <b>157</b>     | <b>&lt;0.001</b> | <b>0.78</b> | <b>0</b>   | <b>24</b>  | <b>-27</b> |
| R Rectal Gyrus                           |                | <0.001           | 0.72        | 8          | 26         | -24        |
| <b>R Cerebellum, Tonsil*</b>             | <b>6</b>       | <b>&lt;0.001</b> | <b>0.68</b> | <b>29</b>  | <b>-46</b> | <b>-44</b> |
| <b>BMI neg.</b>                          |                |                  |             |            |            |            |
| <b>L Cerebellum, Tonsil</b>              | <b>69749</b>   | <b>&lt;0.001</b> | <b>0.86</b> | <b>-6</b>  | <b>-55</b> | <b>-47</b> |
| L Caudate                                |                | <0.001           | 0.85        | -15        | 11         | 10         |
| L Cerebellum, Tuber                      |                | <0.001           | 0.84        | -39        | -58        | -33        |
| R Cerebellum, Tuber                      |                | <0.001           | 0.83        | 32         | -70        | -36        |
| R Cerebellum, Uvula of Vermis            |                | <0.001           | 0.83        | 2          | -72        | -42        |
| R Thalamus                               |                | <0.001           | 0.82        | 6          | -13        | 1          |
| R Thalamus                               |                | <0.001           | 0.82        | 8          | -16        | 6          |
| R Cerebellum, Inferior Semi-Lunar Lobule |                | <0.001           | 0.82        | 2          | -58        | -57        |
| L Parahippocampal Gyrus                  |                | <0.001           | 0.82        | -29        | -12        | -21        |
| R Cerebellum, *                          |                | <0.001           | 0.82        | 18         | -60        | -27        |
| L Cerebellum, Inferior Semi-Lunar Lobule |                | <0.001           | 0.82        | -9         | -75        | -47        |
| L Lingual Gyrus                          |                | <0.001           | 0.82        | -18        | -52        | -2         |
| R Parahippocampal Gyrus                  |                | <0.001           | 0.81        | 23         | -9         | -24        |
| R Cerebellum, Declive                    |                | <0.001           | 0.81        | 35         | -69        | -30        |
| L Cerebellum, Declive                    |                | <0.001           | 0.81        | -6         | -67        | -23        |
| R Cuneus                                 |                | <0.001           | 0.81        | 2          | -84        | 6          |
| L Lingual Gyrus                          |                | <0.001           | 0.81        | -17        | -67        | 1          |
| R Lingual Gyrus                          |                | <0.001           | 0.81        | 15         | -72        | 4          |
| R Cerebellum, Culmen                     |                | <0.001           | 0.81        | 36         | -60        | -32        |
| L Cerebellum, Culmen                     |                | <0.001           | 0.80        | -32        | -42        | -36        |
| R Cerebellum, Tonsil                     |                | <0.001           | 0.80        | 30         | -58        | -50        |
| L Cuneus                                 |                | <0.001           | 0.80        | -14        | -70        | 10         |
| L Cerebellum, Culmen                     |                | <0.001           | 0.80        | -6         | -55        | -24        |
| L Thalamus                               |                | <0.001           | 0.80        | -3         | -21        | 0          |
| R Posterior Cingulate                    |                | <0.001           | 0.80        | 12         | -70        | 9          |
| L Lentiform Nucleus                      |                | <0.001           | 0.79        | -21        | 14         | -9         |
| L Thalamus                               |                | <0.001           | 0.79        | -11        | -18        | 6          |
| L Middle Temporal Gyrus                  |                | <0.001           | 0.79        | -60        | -12        | -11        |
| L Lingual Gyrus                          |                | <0.001           | 0.79        | -18        | -46        | -2         |
| L Lingual Gyrus                          |                | <0.001           | 0.78        | -21        | -63        | 0          |
| L Claustrum                              |                | <0.001           | 0.78        | -38        | -12        | 0          |
| R Posterior Cingulate                    |                | <0.001           | 0.78        | 6          | -58        | 15         |
| <b>R Medial Frontal Gyrus</b>            | <b>322</b>     | <b>&lt;0.001</b> | <b>0.69</b> | <b>6</b>   | <b>38</b>  | <b>-12</b> |
| R Anterior Cingulate                     |                | <0.001           | 0.66        | 14         | 47         | -3         |
| R Medial Frontal Gyrus                   |                | <0.001           | 0.62        | 9          | 47         | 13         |
| <b>R Middle Frontal Gyrus</b>            | <b>421</b>     | <b>&lt;0.001</b> | <b>0.69</b> | <b>53</b>  | <b>35</b>  | <b>18</b>  |
| R Sub-Gyral                              |                | <0.001           | 0.68        | 44         | 42         | 4          |
| <b>R Orbital Gyrus</b>                   | <b>227</b>     | <b>&lt;0.001</b> | <b>0.63</b> | <b>14</b>  | <b>45</b>  | <b>-24</b> |
| R Rectal Gyrus                           |                | 0.009            | 0.53        | 2          | 39         | -30        |
| <b>L Superior Frontal Gyrus</b>          | <b>384</b>     | <b>&lt;0.001</b> | <b>0.62</b> | <b>-15</b> | <b>60</b>  | <b>24</b>  |
| L Superior Frontal Gyrus                 |                | <0.001           | 0.62        | -3         | 53         | 34         |
| L Superior Frontal Gyrus                 |                | <0.001           | 0.60        | -18        | 63         | 15         |
| <b>L Cingulate Gyrus</b>                 | <b>76</b>      | <b>&lt;0.001</b> | <b>0.62</b> | <b>-9</b>  | <b>-18</b> | <b>34</b>  |
| L Cingulate Gyrus                        |                | <0.001           | 0.62        | -8         | -27        | 33         |
| <b>L Postcentral Gyrus</b>               | <b>99</b>      | <b>&lt;0.001</b> | <b>0.60</b> | <b>-35</b> | <b>-24</b> | <b>48</b>  |
| <b>R Superior Frontal Gyrus</b>          | <b>269</b>     | <b>&lt;0.001</b> | <b>0.60</b> | <b>6</b>   | <b>65</b>  | <b>4</b>   |
| <b>R Middle Temporal Gyrus</b>           | <b>71</b>      | <b>&lt;0.001</b> | <b>0.60</b> | <b>56</b>  | <b>-66</b> | <b>3</b>   |
| <b>R Postcentral Gyrus</b>               | <b>50</b>      | <b>&lt;0.001</b> | <b>0.59</b> | <b>54</b>  | <b>-28</b> | <b>51</b>  |
| <b>R Precentral Gyrus</b>                | <b>75</b>      | <b>0.001</b>     | <b>0.58</b> | <b>39</b>  | <b>-21</b> | <b>54</b>  |
| <b>R Fusiform Gyrus</b>                  | <b>62</b>      | <b>0.001</b>     | <b>0.57</b> | <b>53</b>  | <b>-52</b> | <b>-23</b> |
| R Fusiform Gyrus                         |                | 0.008            | 0.53        | 51         | -58        | -15        |
| <b>L Inferior Parietal Lobule</b>        | <b>72</b>      | <b>0.002</b>     | <b>0.56</b> | <b>-57</b> | <b>-43</b> | <b>25</b>  |

Results are listed that survived a threshold of  $r > 0.5$  with a cluster extent threshold of 50 continuous voxels.

MNI: Montreal Neurological Institute.

\*p value FWE corrected on the voxel-level for the search volume;

Bold data indicate primary peak within a cluster; Non-bold data indicate secondary peaks.

Table S2: Intra-pair correlations of brain regional GMV associated with BMI within fraternal twin pairs

| Brain Region                                    | cluster extent                 | pFWE*            | r           | MNI (mm)   |            |            |
|-------------------------------------------------|--------------------------------|------------------|-------------|------------|------------|------------|
|                                                 |                                |                  |             | x          | y          | z          |
| <u>BMI pos.</u>                                 | No suprathreshold correlations |                  |             |            |            |            |
| <u>BMI neg.</u>                                 |                                |                  |             |            |            |            |
| <b>R Superior Temporal Gyrus</b>                | <b>555</b>                     | <b>&lt;0.001</b> | <b>0.68</b> | <b>33</b>  | <b>12</b>  | <b>-47</b> |
| R Middle Temporal Gyrus                         |                                | <0.001           | 0.62        | 45         | 8          | -39        |
| <b>L Cerebellum, Tonsil</b>                     | <b>5214</b>                    | <b>&lt;0.001</b> | <b>0.67</b> | <b>0</b>   | <b>-51</b> | <b>-50</b> |
| L Cerebellum, Tonsil                            |                                | <0.001           | 0.67        | -9         | -57        | -45        |
| L Cerebellum, Inferior Semi-Lunar Lobule        |                                | <0.001           | 0.65        | -11        | -73        | -48        |
| <b>R Lingual Gyrus</b>                          | <b>3935</b>                    | <b>&lt;0.001</b> | <b>0.66</b> | <b>2</b>   | <b>-75</b> | <b>-2</b>  |
| L Cuneus                                        |                                | <0.001           | 0.66        | -12        | -78        | 6          |
| R Cuneus                                        |                                | <0.001           | 0.64        | 17         | -75        | 7          |
| <b>L Lentiform Nucleus</b>                      | <b>929</b>                     | <b>&lt;0.001</b> | <b>0.64</b> | <b>-33</b> | <b>-15</b> | <b>7</b>   |
| L Claustrum                                     |                                | 0.001            | 0.57        | -32        | -28        | 7          |
| L Lentiform Nucleus                             |                                | 0.003            | 0.56        | -30        | -4         | 9          |
| <b>R Superior Frontal Gyrus</b>                 | <b>122</b>                     | <b>&lt;0.001</b> | <b>0.63</b> | <b>21</b>  | <b>54</b>  | <b>-21</b> |
| <b>L Parahippocampal Gyrus</b>                  | <b>1995</b>                    | <b>&lt;0.001</b> | <b>0.63</b> | <b>-24</b> | <b>-19</b> | <b>-20</b> |
| L Extra-Nuclear                                 |                                | <0.001           | 0.60        | -38        | 12         | -9         |
| L Fusiform Gyrus                                |                                | 0.001            | 0.58        | -41        | -3         | -24        |
| <b>L Uncus</b>                                  | <b>297</b>                     | <b>&lt;0.001</b> | <b>0.62</b> | <b>-29</b> | <b>-3</b>  | <b>-48</b> |
| L Uncus                                         |                                | 0.003            | 0.55        | -21        | -9         | -42        |
| L Uncus                                         |                                | 0.051            | 0.50        | -33        | -12        | -36        |
| <b>R Parahippocampal Gyrus</b>                  | <b>707</b>                     | <b>&lt;0.001</b> | <b>0.62</b> | <b>24</b>  | <b>-13</b> | <b>-24</b> |
| R Uncus                                         |                                | <0.001           | 0.60        | 30         | -3         | -27        |
| <b>L Middle Temporal Gyrus</b>                  | <b>71</b>                      | <b>&lt;0.001</b> | <b>0.60</b> | <b>-38</b> | <b>9</b>   | <b>-45</b> |
| L Superior Temporal Gyrus                       |                                | 0.015            | 0.53        | -38        | 18         | -41        |
| <b>R Inferior Frontal Gyrus</b>                 | <b>78</b>                      | <b>&lt;0.001</b> | <b>0.60</b> | <b>35</b>  | <b>11</b>  | <b>-15</b> |
| <b>R Superior Temporal Gyrus</b>                | <b>374</b>                     | <b>&lt;0.001</b> | <b>0.59</b> | <b>59</b>  | <b>3</b>   | <b>-8</b>  |
| R Superior Temporal Gyrus                       |                                | 0.005            | 0.55        | 51         | 12         | -11        |
| <b>R Parahippocampal Gyrus</b>                  | <b>268</b>                     | <b>0.001</b>     | <b>0.58</b> | <b>27</b>  | <b>-28</b> | <b>-8</b>  |
| R Parahippocampal Gyrus                         |                                | 0.001            | 0.58        | 39         | -31        | -14        |
| <b>R Superior Temporal Gyrus</b>                | <b>81</b>                      | <b>0.002</b>     | <b>0.57</b> | <b>59</b>  | <b>-12</b> | <b>4</b>   |
| <b>L Parahippocampal Gyrus</b>                  | <b>66</b>                      | <b>0.002</b>     | <b>0.56</b> | <b>-23</b> | <b>-60</b> | <b>-5</b>  |
| <b>L Medial Frontal Gyrus</b>                   | <b>143</b>                     | <b>0.005</b>     | <b>0.55</b> | <b>-18</b> | <b>65</b>  | <b>9</b>   |
| L Medial Frontal Gyrus                          |                                | 0.010            | 0.54        | -8         | 66         | 1          |
| <b>R Claustrum</b>                              | <b>364</b>                     | <b>0.007</b>     | <b>0.54</b> | <b>38</b>  | <b>-21</b> | <b>-5</b>  |
| R Claustrum                                     |                                | 0.008            | 0.54        | 35         | -19        | 9          |
| R Insula                                        |                                | 0.008            | 0.54        | 42         | -22        | 9          |
| <b>R Superior Temporal Gyrus</b>                | <b>57</b>                      | <b>0.008</b>     | <b>0.54</b> | <b>41</b>  | <b>14</b>  | <b>-32</b> |
| <b>R Cerebellum, Inferior Semi-Lunar Lobule</b> | <b>51</b>                      | <b>0.010</b>     | <b>0.54</b> | <b>38</b>  | <b>-68</b> | <b>-51</b> |

Results are listed that survived a threshold of  $r > 0.5$  with a cluster extent threshold of 50 continuous voxels.

MNI: Montreal Neurological Institute.

\*p value FWE corrected on the voxel-level for the search volume;

Bold data indicate primary peak within a cluster; Non-bold data indicate secondary peaks.
